# Supplementary material for: MicroRNA Expression Profiling in Psoriatic Arthritis
Source: Biomed Res Int. 2018 Apr 23;2018:7305380. doi: 10.1155/2018/7305380 (PMC5937573; doi:10.1155/2018/7305380)
Supplement: Supplementary Table 1 — KEGG pathway enrichment analysis in PsA only active miRNAs subset. [file 7305380.f1.xlsx]

## Sheet: PsA only active
SUPPLEMENTARY TABLE 1. KEGG pathway enrichment analysis in PsA only active miRNAs subset
KEGG pathway	p-value	#genes	#miRNAs
Proteoglycans in cancer	4.61888e-19	131	13
Viral carcinogenesis	2.73154e-13	130	14
Chronic myeloid leukemia	8.59388e-12	60	12
Hepatitis B	2.34052e-09	94	14
Fatty acid elongation	4.11868e-09	13	7
Pancreatic cancer	6.2514e-09	52	12
Cell cycle	2.76483e-08	88	13
Glioma	4.11959e-08	46	12
Adherens junction	7.9119e-08	53	13
Protein processing in endoplasmic reticulum	1.55454e-07	108	13
Bacterial invasion of epithelial cells	2.81503e-07	55	13
Non-small cell lung cancer	9.85778e-07	43	12
Thyroid hormone signaling pathway	9.85778e-07	79	13
Non-alcoholic fatty liver disease (NAFLD)	9.85778e-07	96	13
Colorectal cancer	9.85778e-07	47	14
Oocyte meiosis	1.33671e-06	71	12
Bladder cancer	1.33671e-06	32	12
TGF-beta signaling pathway	1.33671e-06	52	13
Prostate cancer	2.40438e-06	64	13
Renal cell carcinoma	8.29693e-06	48	14
FoxO signaling pathway	1.54252e-05	87	13
Ubiquitin mediated proteolysis	1.90589e-05	85	12
Prion diseases	2.12542e-05	15	11
Shigellosis	2.12542e-05	45	12
Neurotrophin signaling pathway	3.40298e-05	77	13
Epstein-Barr virus infection	3.55594e-05	121	13
p53 signaling pathway	3.65406e-05	48	11
Hippo signaling pathway	3.68681e-05	88	13
Estrogen signaling pathway	4.1581e-05	59	13
Lysine degradation	4.81787e-05	29	10
Endometrial cancer	6.39561e-05	37	13
Pathways in cancer	6.39561e-05	215	14
mTOR signaling pathway	0.000110373	43	13
TNF signaling pathway	0.000185536	69	13
Thyroid cancer	0.000200436	22	13
MAPK signaling pathway	0.000302308	138	13
Central carbon metabolism in cancer	0.000326284	43	13
ErbB signaling pathway	0.000415553	55	13
Progesterone-mediated oocyte maturation	0.000436561	57	12
Ribosome	0.00055278	82	12
Prolactin signaling pathway	0.000861461	44	12
Transcriptional misregulation in cancer	0.000894508	96	12
Small cell lung cancer	0.0012867	54	12
HTLV-I infection	0.00194911	151	14
Fatty acid biosynthesis	0.0020049	5	8
Sphingolipid signaling pathway	0.00264843	68	13
Signaling pathways regulating pluripotency of stem cells	0.0034371	80	14
Huntington's disease	0.00352149	100	13
RNA transport	0.00353159	94	12
Endocytosis	0.00361634	120	11
Focal adhesion	0.00423953	114	14
Circadian rhythm	0.00613816	22	12
HIF-1 signaling pathway	0.00638473	63	13
Acute myeloid leukemia	0.00640417	37	12
Steroid biosynthesis	0.0093501	11	9
mRNA surveillance pathway	0.0106662	55	12
Insulin signaling pathway	0.0112054	79	12
AMPK signaling pathway	0.0112054	75	13
Proteasome	0.0216158	28	9
Parkinson's disease	0.0216158	75	12
Fc gamma R-mediated phagocytosis	0.0236135	52	12
Pathogenic Escherichia coli infection	0.0236135	34	14
Chagas disease (American trypanosomiasis)	0.0305084	56	15
Hepatitis C	0.0354873	71	13
Wnt signaling pathway	0.0368696	73	14
Choline metabolism in cancer	0.0494586	57	14
