# Supplementary material for: MicroRNA Expression Profiling in Psoriatic Arthritis
Source: Biomed Res Int. 2018 Apr 23;2018:7305380. doi: 10.1155/2018/7305380 (PMC5937573; doi:10.1155/2018/7305380)
Supplement: Supplementary Table 2 — KEGG pathway enrichment analysis in PsA common miRNAs subset. [file 7305380.f2.xlsx]

## Sheet: PsA common
SUPPLEMENTARY TABLE 2. KEGG pathway enrichment analysis in PsA common miRNAs subset
KEGG pathway	p-value	#genes	#miRNAs
Fatty acid biosynthesis	3.21256e-17	2	1
Lysine degradation	1.50968e-08	13	4
Fatty acid metabolism	6.55302e-06	7	2
Adherens junction	4.32662e-05	19	5
N-Glycan biosynthesis	6.01832e-05	15	3
Hippo signaling pathway	0.000160383	24	5
Protein processing in endoplasmic reticulum	0.00452235	31	5
Estrogen signaling pathway	0.00976057	20	4
Proteoglycans in cancer	0.014816	28	4
Cell cycle	0.014816	25	5
Bacterial invasion of epithelial cells	0.0186417	15	4
Transcriptional misregulation in cancer	0.0240845	31	5
Viral carcinogenesis	0.0240845	35	5
HTLV-I infection	0.0291752	43	5
Glioma	0.0307958	13	3
Bladder cancer	0.0367948	10	2
Glycosaminoglycan biosynthesis - keratan sulfate	0.0428878	3	1
