# Supplementary material for: MicroRNA Expression Profiling in Psoriatic Arthritis
Source: Biomed Res Int. 2018 Apr 23;2018:7305380. doi: 10.1155/2018/7305380 (PMC5937573; doi:10.1155/2018/7305380)
Supplement: Supplementary Table 3 — KEGG pathway enrichment analysis in PsA nonactive miRNAs subset. [file 7305380.f3.xlsx]

## Sheet: PsA only NON active
SUPPLEMENTARY TABLE 3. KEGG pathway enrichment analysis in PsA non active miRNAs subset
KEGG pathway	p-value	#genes	#miRNAs
Fatty acid biosynthesis	6.84154e-13	3	2
Adherens junction	5.06215e-11	29	7
Hippo signaling pathway	2.74898e-07	40	7
Lysine degradation	2.74898e-07	16	8
Proteoglycans in cancer	8.87133e-05	49	7
Endocytosis	0.00011272	58	7
Protein processing in endoplasmic reticulum	0.000145788	49	7
Viral carcinogenesis	0.000189575	54	8
TGF-beta signaling pathway	0.000341412	22	7
Colorectal cancer	0.000719103	21	7
Cell cycle	0.000734712	37	7
Thyroid hormone signaling pathway	0.001304	32	7
Bacterial invasion of epithelial cells	0.00189955	22	7
Hepatitis B	0.00304226	37	7
Pathways in cancer	0.00304226	84	7
Epstein-Barr virus infection	0.00406791	51	7
p53 signaling pathway	0.00447233	23	7
Oocyte meiosis	0.00479459	30	7
FoxO signaling pathway	0.00536042	36	7
Spliceosome	0.00655706	36	7
Toll-like receptor signaling pathway	0.00655706	28	7
Chronic myeloid leukemia	0.00655706	23	7
Shigellosis	0.006963	20	7
Pancreatic cancer	0.00836334	20	7
Chagas disease (American trypanosomiasis)	0.00895619	29	7
Regulation of actin cytoskeleton	0.0148628	46	7
Prostate cancer	0.0166242	24	7
Ubiquitin mediated proteolysis	0.0301752	36	7
Pathogenic Escherichia coli infection	0.0318064	17	6
Toxoplasmosis	0.0318064	29	7
Small cell lung cancer	0.0318064	23	7
NF-kappa B signaling pathway	0.0383043	20	7
Viral myocarditis	0.0401494	17	7
Circadian rhythm	0.0407637	10	6
RNA degradation	0.0414172	21	7
Measles	0.0416829	35	7
ErbB signaling pathway	0.0480686	19	7
