# Supplementary material for: MicroRNA Expression Profiling in Psoriatic Arthritis
Source: Biomed Res Int. 2018 Apr 23;2018:7305380. doi: 10.1155/2018/7305380 (PMC5937573; doi:10.1155/2018/7305380)
Supplement: Supplementary Table 4 — TNF signaling pathway target genes of PsA only active miRNAs. [file 7305380.f4.xlsx]

## Sheet: Foglio1
SUPPLEMENTARY TABLE 4. TNF signaling pathway target genes of PsA only active miRNAs
Gene Ensembl ID:	Gene name:	Tarbase miRNA interaction:
ENSG00000105221	AKT2	miR-331-3p
ENSG00000117020	AKT3	miR-17-5p
ENSG00000115966	ATF2	miR-17-5p; miR-186-5p
ENSG00000108691	CCL2	miR-199a-5p
ENSG00000170345	FOS	miR-199a-3p; miR-148a-3p; miR-130a-3p; miR-192-5p; miR-331-3p
ENSG00000149968	MMP3	miR-199a-5p
ENSG00000109320	NFKB1	miR-148a-3p; miR-130a-3p; miR-92a-3p
ENSG00000003400	CASP10	miR-17-5p
ENSG00000164305	CASP3	miR-186-5p
ENSG00000064012	CASP8	miR-17-5p
ENSG00000165806	CASP7	miR-192-5p
ENSG00000051382	PIK3CB	miR-199a-3p; miR-130a-3p; miR-186-5p; miR-92a-3p
ENSG00000146592	CREB5	miR-130a-3p; miR-17-5p
ENSG00000105647	PIK3R2	miR-126-3p; miR-130a-3p
ENSG00000167207	NOD2	miR-192-5p
ENSG00000213341	CHUK	miR-130a-3p
ENSG00000034152	MAP2K3	miR-148a-3p
ENSG00000162692	VCAM1	miR-126-3p
ENSG00000163735	CXCL5	miR-130a-3p
ENSG00000055208	TAB2	miR-199a-3p; miR-151a-5p; miR-92a-3p
ENSG00000081041	CXCL2	miR-192-5p; miR-151a-5p
ENSG00000028137	TNFRSF1B	miR-130a-3p
ENSG00000157625	TAB3	miR-199a-3p; miR-126-3p; miR-148a-3p
ENSG00000100784	RPS6KA5	miR-148a-3p; miR-130a-3p; miR-17-5p; miR-186-5p
ENSG00000108984	MAP2K6	miR-148a-3p; miR-130a-3p
ENSG00000118260	CREB1	miR-199a-3p; miR-130a-3p
ENSG00000104365	IKBKB	miR-199a-5p
ENSG00000172216	CEBPB	miR-148a-3p
ENSG00000164136	IL15	miR-192-5p
ENSG00000128342	LIF	miR-199a-5p; miR-17-5p
ENSG00000065559	MAP2K4	miR-92a-3p
ENSG00000197442	MAP3K5	miR-17-5p
ENSG00000135341	MAP3K7	miR-92a-3p
ENSG00000156711	MAPK13	miR-17-5p
ENSG00000102882	MAPK3	miR-17-5p
ENSG00000006062	MAP3K14	miR-130a-3p
ENSG00000050748	MAPK9	miR-199a-3p; miR-192-5p; miR-17-5p; miR-92a-3p
ENSG00000171608	PIK3CD	miR-126-3p
ENSG00000177606	JUN	miR-199a-5p; miR-4787-5p; miR-186-5p; miR-92a-3p
ENSG00000117461	PIK3R3	miR-148a-3p; miR-175p; miR-186-5p; miR-331-3p
ENSG00000171223	JUNB	miR-199a-3p; miR-148a-3p; miR-199a-5p; miR-186-5p
ENSG00000107643	MAPK8	miR-199a-3p; miR-17-5p; miR-92a-3p
ENSG00000142208	AKT1	miR-126-3p; miR-451a; miR-17-5p; miR-331-3p
ENSG00000157227	MMP14	miR-17-5p
ENSG00000100985	MMP9	miR-451a
ENSG00000100906	NFKBIA	miR-130a-3p
ENSG00000073756	PTGS2	miR-199a-3p; miR-148a-3p
ENSG00000145675	PIK3R1	miR-199a-3p; miR-17-5p
ENSG00000087470	DNM1L	miR-130a-3p; miR-17-5p
ENSG00000101384	JAG1	miR-126-3p; miR-148a-3p
ENSG00000026103	FAS	miR-199a-3p
ENSG00000182158	CREB3L2	miR-192-5p; miR-92a-3p
ENSG00000121879	PIK3CA	miR-126-3p; miR-451a; miR-17-5p
ENSG00000107968	MAP3K8	miR-148a-3p; miR-17-5p
ENSG00000078401	EDN1	miR-199a-5p; miR-130a-3p
ENSG00000232810	TNF	miR-130a-3p
ENSG00000007908	SELE	miR-17-5p
ENSG00000118503	TNFAIP3	miR-17-5p
ENSG00000131323	TRAF3	miR-92a-3p
ENSG00000173039	RELA	miR-130a-3p
ENSG00000136244	IL6	miR-192-5p
ENSG00000100030	MAPK1	miR-199a-3p; miR-126-3p; miR-148a-3p; miR-151a-5p; miR-17-5p; miR-331-3p
ENSG00000184371	CSF1	miR-130a-3p; miR-17-5p
ENSG00000128272	ATF4	miR-192-5p; miR-331-3p
ENSG00000090339	ICAM1	miR-17-5p
ENSG00000078747	ITCH	miR-92a-3p
ENSG00000247077	PGAM5	miR-17-5p; miR-186-5p
ENSG00000162302	RPS6KA4	miR-92a-3p
