# Supplementary material for: MicroRNA Expression Profiling in Psoriatic Arthritis
Source: Biomed Res Int. 2018 Apr 23;2018:7305380. doi: 10.1155/2018/7305380 (PMC5937573; doi:10.1155/2018/7305380)
Supplement: Supplementary Table 5 — MAPK signaling pathway target genes of PsA only active miRNAs. [file 7305380.f5.xlsx]

## Sheet: Foglio1
SUPPLEMENTARY TABLE 5. MAPK signaling pathway target genes of PsA only active miRNAs
Gene Ensembl ID:	Gene name:	Tarbase miRNA interaction:
ENSG00000137486	ARRB1	miR-92a-3p; miR-186-5p
ENSG00000115966	ATF2	miR-186-5p; miR-17-5p
ENSG00000105221	AKT2	miR-331-3p
ENSG00000117020	AKT3	miR-17-5p
ENSG00000157764	BRAF	miR-130a-3p; miR-451a; miR-92a-3p; miR-186-5p; miR-17-5p
ENSG00000120875	DUSP4	miR-151a-5p; miR-17-5p; miR-92a-3p
ENSG00000126803	HSPA2	miR-192-5p
ENSG00000170345	FOS	miR-130a-3p; miR-148a-3p; miR-199a-3p; miR-192-5p; miR-17-5p; miR-331-3p
ENSG00000154229	PRKCA	miR-199a-5p; miR-92a-3p
ENSG00000204389	HSPA1A	miR-192-5p; miR-92a-3p; miR-186-5p; miR-331-5p
ENSG00000106799	TGFBR1	miR-199a-5p; miR-148a-3p; miR-92a-3p; miR-331-3p
ENSG00000109320	NFKB1	miR-130a-3p; miR-148a-3p; miR-92a-3p
ENSG00000146535	GNA12	miR-199a-3p; miR-17-5p
ENSG00000115594	IL1R1	miR-192-5p
ENSG00000085276	MECOM	miR-92a-3p
ENSG00000081189	MEF2C	miR-92a-3p
ENSG00000079277	MKNK1	miR-186-5p
ENSG00000197461	PDGFA	miR-186-5p
ENSG00000168907	PLA2G4F	miR-92a-3p; miR-331-3p
ENSG00000138814	PPP3CA	miR-186-5p
ENSG00000142875	PRKACB	miR-17-5p
ENSG00000008735	MAPK8IP2	miR-192-5p; miR-331-3p
ENSG00000213281	NRAS	miR-130a-3p; miR-17-5p; miR-92a-3p
ENSG00000099942	CRKL	miR-148a-3p; miR-92a-3p
ENSG00000101109	STK4	miR-130a-3p; miR-148a-3p; miR-199a-3p; miR-192-5p; miR-92a-3p; miR-186-5p
ENSG00000158711	ELK4	miR-130a-3p; miR-192-5p; miR-17-5p; miR-92a-3p
ENSG00000167193	CRK	miR-126-3p; miR-192-5p; miR-92a-3p; miR-186-5p; miR-17-5p
ENSG00000101224	CDC25B	miR-148a-3p
ENSG00000180370	PAK2	miR-199a-3p; miR-17-5p; miR-186-5p
ENSG00000116473	RAP1A	miR-130a-3p; miR-331-3p
ENSG00000149930	TAOK2	miR-130a-3p; miR-148a-3p; miR-17-5p; miR-92a-3p; miR-331-3p
ENSG00000172380	GNG12	miR-130a-3p; miR-148a-3p; miR-17-5p; miR-186-5p
ENSG00000137764	MAP2K5	miR-148a-3p
ENSG00000221823	PPP3R1	miR-130a-3p; miR-17-5p
ENSG00000132155	RAF1	miR-148a-3p; miR-186-5p
ENSG00000213341	CHUK	miR-130a-3p
ENSG00000011566	MAP4K3	miR-148a-3p
ENSG00000034152	MAP2K3	miR-148a-3p
ENSG00000143851	PTPN7	miR-126-3p
ENSG00000146648	EGFR	miR-130a-3p; miR-331-3p
ENSG00000129682	FGF13	miR-186-5p
ENSG00000138675	FGF5	miR-17-5p
ENSG00000066468	FGFR2	miR-186-5p
ENSG00000116717	GADD45A	miR-130a-3p; mmiR-92a-3p
ENSG00000085511	MAP3K4	miR-148a-3p; miR-92a-3p
ENSG00000095015	MAP3K1	miR-199a-3p; miR-192-5p
ENSG00000055208	TAB2	miR-151a-5p; miR-199a-3p; miR-92a-3p
ENSG00000133703	KRAS	miR-126-3p; miR-148a-3p; miR-199a-5p; miR-92a-3p
ENSG00000105329	TGFB1	miR-199a-5p; miR-199a-3p
ENSG00000176697	BDNF	miR-148a-3p
ENSG00000173327	MAP3K11	miR-199a-5p; miR-17-5p
ENSG00000133818	RRAS2	miR-199a-3p
ENSG00000160551	TAOK1	miR-130a-3p; miR-199a-3p; miR-17-5p; miR-92a-3p; miR-186-5p; miR-331-3p
ENSG00000100784	RPS6KA5	miR-130a-3p; miR-148a-3p; miR-17-5p; miR-186-5p
ENSG00000108984	MAP2K6	miR-130a-3p; miR-148a-3p
ENSG00000106211	HSPB1	miR-151a-5p; miR-148a-3p
ENSG00000099860	GADD45B	miR-130a-3p
ENSG00000104365	IKBKB	miR-199a-5p
ENSG00000087095	NLK	miR-192-5p; miR-17-5p; miR-92a-3p
ENSG00000145715	RASA1	miR-130a-3p; miR-17-5p; miR-92a-3p
ENSG00000006062	MAP3K14	miR-130a-3p
ENSG00000050748	MAPK9	miR-199a-3p; miR-192-5p; miR-17-5p; miR-92a-3p
ENSG00000177606	JUN	miR-199a-5p; miR-4787-5p; miR-17-5p; miR-92a-3p; miR-186-5p
ENSG00000089022	MAPKAPK5	miR-130a-3p
ENSG00000172575	RASGRP1	miR-148a-3p
ENSG00000109756	RAPGEF2	miR-130a-3p; miR-199a-3p; miR-331-3p
ENSG00000107643	MAPK8	miR-199a-3p; miR-17-5p; miR-92a-3p
ENSG00000142208	AKT1	miR-126-3p; miR-451a; miR-17-5p; miR-331-3p
ENSG00000136997	MYC	miR-151a-5p; miR-130a-3p; miR-148a-3p; miR-199a-5p; miR-192-5p; miR-451a
ENSG00000100614	PPM1A	miR-148a-3p; miR-192-5p; miR-17-5p; miR-186-5p
ENSG00000136068	FLNB	miR-130a-3p; miR-92-3p
ENSG00000091436	ZAK	miR-148a-3p; miR-17-5p; miR-92a-3p; miR-186-5p
ENSG00000072062	PRKACA	miR-151a-5p; miR-331-3p
ENSG00000196924	FLNA	miR-148a-3p; miR-331-3p; miR-92a-3p
ENSG00000115904	SOS1	miR-130a-3p; miR-148a-3p
ENSG00000138685	FGF2	miR-148a-3p; miR-192-5p; miR-92a-3p; miR-186-5p
ENSG00000070831	CDC42	miR-199a-3p; miR-186-5p
ENSG00000104375	STK3	miR-192-5p; miR-92a-3p; miR-186-5p
ENSG00000109971	HSPA8	miR-151a-5p; miR-130a-3p; miR-148a-3p; miR-92a-3p; miR-186-5p
ENSG00000196712	NF1	miR-126-3p; miR-17-5p; miR-186-5p
ENSG00000143507	DUSP10	miR-92a-3p
ENSG00000158050	DUSP2	miR-186-5p; miR-17-5p
ENSG00000108861	DUSP3	miR-186-5p
ENSG00000139318	DUSP6	miR-92a-3p
ENSG00000164086	DUSP7	miR-130a-3p; miR-186-5p
ENSG00000166501	PRKCB	miR-199a-3p
ENSG00000026103	FAS	miR-199a-3p
ENSG00000174775	HRAS	miR-130a-3p; miR-148a-3p
ENSG00000177189	RPS6KA3	miR-199a-3p; miR-17-5p
ENSG00000065559	MAP2K4	miR-92a-3p
ENSG00000139625	MAP3K12	miR-17-5p; miR-331-3p
ENSG00000073803	MAP3K13	miR-17-5p
ENSG00000169967	MAP3K2	miR-186-5p; miR-17-5p
ENSG00000197442	MAP3K5	miR-17-5p
ENSG00000142733	MAP3K6	miR-92a-3p
ENSG00000135341	MAP3K7	miR-92a-3p
ENSG00000156711	MAPK13	miR-17-5p
ENSG00000102882	MAPK3	miR-17-5p
ENSG00000166484	MAPK7	miR-17-5p
ENSG00000138834	MAPK8IP3	miR-126-3p
ENSG00000117632	STMN1	miR-199a-3p
ENSG00000107968	MAP3K8	miR-148a-3p; miR-17-5p
ENSG00000138032	PPM1B	miR-148a-3p; miR-92a-3p; miR-186-5p
ENSG00000165995	CACNB2	miR-130a-3p; miR-148a-3p
ENSG00000067191	CACNB1	miR-186-5p
ENSG00000142408	CACNG8	miR-331-3p
ENSG00000099875	MKNK2	miR-148a-3p; miR-192-5p; miR-17-5p; miR-92a-3p; miR-331-3p
ENSG00000164305	CASP3	miR-186-5p
ENSG00000138166	DUSP5	miR-148a-3p; miR-199a-3p; miR-92a-3p; miR-331-3p
ENSG00000204388	HSPA1B	miR-126-3p; miR-92a-3p; miR-186-5p; miR-331-3p
ENSG00000232810	TNF	miR-130a-3p
ENSG00000173039	RELA	miR-130a-3p
ENSG00000072736	NFATC3	miR-192-5p; miR-17-5p
ENSG00000077782	FGFR1	miR-130a-3p
ENSG00000111266	DUSP16	miR-148a-3p; miR-192-5p
ENSG00000100030	MAPK1	miR-151a-5p; miR-148a-3p; miR-126-3p; miR-199a-3p; miR-17-5p; miR-331-3p
ENSG00000177885	GRB2	miR-151a-5p; miR-130a-3p; miR-148a-3p; miR-17-5p
ENSG00000162889	MAPKAPK2	miR-148a-3p
ENSG00000120129	DUSP1	miR-151a-5p; miR-148a-3p; miR-92a-3p
ENSG00000163513	TGFBR2	miR-130a-3p; miR-17-5p; miR-186-5p
ENSG00000128272	ATF4	miR-192-5p; miR-331-3p
ENSG00000123358	NR4A1	miR-151a-5p
ENSG00000130522	JUND	miR-186-5p
ENSG00000126767	ELK1	miR-186-5p
ENSG00000115008	IL1A	miR-186-5p
ENSG00000141510	TP53	miR-17-5p
ENSG00000136238	RAC1	miR-17-5p
ENSG00000127314	RAP1B	miR-17-5p
ENSG00000155903	RASA2	miR-17-5p
ENSG00000162302	RPS6KA4	miR-92a-3p
ENSG00000072133	RPS6KA6	miR-17-5p
ENSG00000100485	SOS2	miR-17-5p
ENSG00000112658	SRF	miR-92a-3p; miR-186-5p; miR-331-3p
ENSG00000135090	TAOK3	miR-17-5p
ENSG00000071242	RPS6KA2	miR-17-5p
