# Supplementary material for: MicroRNA Expression Profiling in Psoriatic Arthritis
Source: Biomed Res Int. 2018 Apr 23;2018:7305380. doi: 10.1155/2018/7305380 (PMC5937573; doi:10.1155/2018/7305380)
Supplement: Supplementary Table 6 — Target genes of PsA only active miRNAs subset belonging to WNT signaling pathway. [file 7305380.f6.xlsx]

## Sheet: Foglio1
SUPPLEMENTARY TABLE 6. Target genes of PsA only active miRNAs subset belonging to WNT signaling pathway
Gene Ensembl ID:	Gene name:	Tarbase miRNA interaction:
ENSG00000155760	FZD7	miR-192-5p
ENSG00000178585	CTNNBIP1	miR-192-5p
ENSG00000082701	GSK3B	miR-130a-3p; miR-17-5p; miR-92a-3p; miR-331-3p
ENSG00000154229	PRKCA	miR-199a-5p; miR-92a-3p
ENSG00000163251	FZD5	miR-130a-3p; miR-192-5p
ENSG00000137673	MMP7	miR-126-3p
ENSG00000101849	TBL1X	miR-192-5p; miR-148a-3p; miR-92a-3p
ENSG00000166167	BTRC	miR-148a-3p; miR-199a-3p; miR-17-5p
ENSG00000134982	APC	miR-192-5p; miR-148a-3p; miR-186-5p
ENSG00000173218	VANGL1	miR-130a-3p; miR-192-5p; miR-199a-3p; miR-17-5p; miR-92a-3p; miR-331-3p
ENSG00000162738	VANGL2	miR-92a-3p; miR-186-5p
ENSG00000169884	WNT10B	miR-130a-3p
ENSG00000159692	CTBP1	miR-148a-3p; miR-17-5p; miR-92a-3p; miR-186-5p
ENSG00000100888	CHD8	miR-130a-3p; miR-17-5p
ENSG00000005339	CREBBP	miR-92a-3p; miR-186-5p
ENSG00000110092	CCND1	miR-92a-3p; miR-17-5p; miR-186-5p
ENSG00000118971	CCND2	miR-130a-3p; miR-148a-3p; miR-17-5p; miR-92a-3p; miR-186-5p
ENSG00000134318	ROCK2	miR-130a-3p; miR-17-5p
ENSG00000164930	FZD6	miR-148a-3p; miR-17-5p; miR-92a-3p
ENSG00000221823	PPP3R1	miR-130a-3p; miR-17-5p
ENSG00000175029	CTBP2	miR-130a-3p; miR-126-3p
ENSG00000055130	CUL1	miR-148a-3p; miR-17-5p
ENSG00000103126	AXIN1	miR-192-5p; miR-92a-3p
ENSG00000108379	WNT3	miR-192-5p
ENSG00000114251	WNT5A	miR-92a-3p; miR-17-5p; miR-186-5p
ENSG00000067560	RHOA	miR-130a-3p; miR-17-5p; miR-186-5p
ENSG00000104290	FZD3	miR-130a-3p; miR-17-5p
ENSG00000113558	SKP1	miR-151a-5p; miR-92a-3p
ENSG00000139174	PRICKLE1	miR-192-5p; miR-17-5p
ENSG00000087095	NLK	miR-192-5p; miR-17-5p; miR-92a-3p
ENSG00000174804	FZD4	miR-192-5p; miR-17-5p; miR-186-5p
ENSG00000163904	SENP2	miR-148a-3p
ENSG00000135341	MAP3K7	miR-92a-3p
ENSG00000050748	MAPK9	miR-192-5p; miR-199a-3p; miR-17-5p; miR-92a-3p
ENSG00000076716	GPC4	miR-192-5p
ENSG00000177606	JUN	miR-199a-5p; miR-4787-5p; miR-17-5p; miR-92a-3p; miR-186-5p
ENSG00000111432	FZD10	miR-148a-3p; miR-199a-3p
ENSG00000166949	SMAD3	miR-17-5p
ENSG00000141646	SMAD4	miR-130a-3p; miR-199a-5p; miR-17-5p; miR-92a-3p; miR-186-5p
ENSG00000168036	CTNNB1	miR-126-3p; miR-151a-5p; miR-575; miR-331-3p
ENSG00000101096	NFATC2	miR-192-5p
ENSG00000107643	MAPK8	miR-130a-3p; miR-199a-3p; miR-17-5p; miR-92a-3p
ENSG00000113712	CSNK1A1	miR-199a-3p; miR-126-3p; miR-17-5p; miR-186-5p
ENSG00000136997	MYC	miR-130a-3p; miR-192-5p; miR-148a-3p; miR-151a-5p; miR-199a-5p; miR-17-5p; miR-92a-3p
ENSG00000072062	PRKACA	miR-151a-5p; miR-331-3p
ENSG00000138814	PPP3CA	miR-186-5p
ENSG00000163637	PRICKLE2	miR-17-5p
ENSG00000142875	PRKACB	miR-17-5p
ENSG00000157240	FZD1	miR-192-5p
ENSG00000166501	PRKCB	miR-199a-3p
ENSG00000213923	CSNK1E	miR-575
ENSG00000100393	EP300	miR-130a-3p; miR-192-5p; miR-148a-3p; miR-17-5p; miR-92a-3p
ENSG00000141510	TP53	miR-17-5p
ENSG00000095739	BAMBI	miR-130a-3p; miR-17-5p
ENSG00000107984	DKK1	miR-130a-3p; miR-148a-3p
ENSG00000081059	TCF7	miR-192-5p
ENSG00000152284	TCF7L1	miR-17-5p
ENSG00000058404	CAMK2B	miR-186-5p
ENSG00000148660	CAMK2G	miR-331-3p
ENSG00000072736	NFATC3	miR-192-5p; miR-17-5p
ENSG00000100592	DAAM1	miR-130a-3p; miR-192-5p; miR-148a-3p
ENSG00000072803	FBXW11	miR-126-3p; miR-92a-3p
ENSG00000175592	FOSL1	miR-186-5p
ENSG00000181274	FRAT2	miR-92a-3p
ENSG00000177565	TBL1XR1	miR-130a-3p; miR-148a-3p; miR-92a-3p; miR-186-5p
ENSG00000112033	PPARD	miR-148a-3p; miR-92a-3p; miR-331-3p
ENSG00000112576	CCND3	miR-199a-3p
ENSG00000101266	CSNK2A1	miR-186-5p
ENSG00000204435	CSNK2B	miR-92a-3p
ENSG00000168772	CXXC4	miR-186-5p
ENSG00000070018	LRP6	miR-92a-3p; miR-17-5p
ENSG00000136238	RAC1	miR-17-5p
ENSG00000100387	RBX1	miR-92a-3p
