# Supplementary material for: MicroRNA Expression Profiling in Psoriatic Arthritis
Source: Biomed Res Int. 2018 Apr 23;2018:7305380. doi: 10.1155/2018/7305380 (PMC5937573; doi:10.1155/2018/7305380)
Supplement: Supplementary Table 7 — “Proteoglycans in cancer” target gene list for PsA only active, PsA common, and PsA only nonactive miRNA subsets. [file 7305380.f7.xlsx]

## Sheet: Foglio1
SUPPLEMENTARY TABLE 7. "Proteoglycans in cancer" target gene list for PsA only active, Psa common and PsA only non active miRNA subsets.
PsA only active			PsA common			PsA only non active
Gene Ensembl ID:	Gene name:		Gene Ensembl ID:	Gene name:		Gene Ensembl ID:	Gene name:
ENSG00000155760	FZD7		ENSG00000075624	ACTB		ENSG00000075624	ACTB
ENSG00000091831	ESR1		ENSG00000175387	SMAD2		ENSG00000137462	TLR2
ENSG00000172531	PPP1CA		ENSG00000169884	WNT10B		ENSG00000150593	PDCD4
ENSG00000157764	BRAF		ENSG00000184009	ACTG1		ENSG00000105976	MET
ENSG00000075624	ACTB		ENSG00000161638	ITGA5		ENSG00000150093	ITGB1
ENSG00000113070	HBEGF		ENSG00000132155	RAF1		ENSG00000092820	EZR
ENSG00000154229	PRKCA		ENSG00000140443	IGF1R		ENSG00000067900	ROCK1
ENSG00000168610	STAT3		ENSG00000104290	FZD3		ENSG00000175387	SMAD2
ENSG00000163251	FZD5		ENSG00000149269	PAK1		ENSG00000110395	CBL
ENSG00000141736	ERBB2		ENSG00000142798	HSPG2		ENSG00000148660	CAMK2G
ENSG00000105976	MET		ENSG00000090020	SLC9A1		ENSG00000137801	THBS1
ENSG00000150093	ITGB1		ENSG00000087245	MMP2		ENSG00000196914	ARHGEF12
ENSG00000092820	EZR		ENSG00000111679	PTPN6		ENSG00000186298	PPP1CC
ENSG00000067900	ROCK1		ENSG00000110092	CCND1		ENSG00000184009	ACTG1
ENSG00000100485	SOS2		ENSG00000136997	MYC		ENSG00000166225	FRS2
ENSG00000175387	SMAD2		ENSG00000167244	IGF2		ENSG00000140575	IQGAP1
ENSG00000110395	CBL		ENSG00000136068	FLNB		ENSG00000140443	IGF1R
ENSG00000148660	CAMK2G		ENSG00000072062	PRKACA		ENSG00000146648	EGFR
ENSG00000115884	SDC1		ENSG00000100234	TIMP3		ENSG00000136869	TLR4
ENSG00000213281	NRAS		ENSG00000115904	SOS1		ENSG00000067560	RHOA
ENSG00000137801	THBS1		ENSG00000135047	CTSL		ENSG00000065361	ERBB3
ENSG00000051382	PIK3CB		ENSG00000197122	SRC		ENSG00000137154	RPS6
ENSG00000185920	PTCH1		ENSG00000102882	MAPK3		ENSG00000147065	MSN
ENSG00000169884	WNT10B		ENSG00000115414	FN1		ENSG00000142798	HSPG2
ENSG00000105974	CAV1		ENSG00000124762	CDKN1A		ENSG00000105221	AKT2
ENSG00000114251	WNT5A		ENSG00000140992	PDPK1		ENSG00000138448	ITGAV
ENSG00000105647	PIK3R2		ENSG00000177885	GRB2		ENSG00000117461	PIK3R3
ENSG00000196914	ARHGEF12		ENSG00000026508	CD44		ENSG00000110092	CCND1
ENSG00000186298	PPP1CC					ENSG00000168036	CTNNB1
ENSG00000184009	ACTG1					ENSG00000100644	HIF1A
ENSG00000089159	PXN					ENSG00000167244	IGF2
ENSG00000134318	ROCK2					ENSG00000063046	EIF4B
ENSG00000166225	FRS2					ENSG00000183943	PRKX
ENSG00000164930	FZD6					ENSG00000136238	RAC1
ENSG00000137710	RDX					ENSG00000139329	LUM
ENSG00000140575	IQGAP1					ENSG00000026103	FAS
ENSG00000161638	ITGA5					ENSG00000117020	AKT3
ENSG00000132155	RAF1					ENSG00000128710	HOXD10
ENSG00000156299	TIAM1					ENSG00000115414	FN1
ENSG00000108379	WNT3					ENSG00000124762	CDKN1A
ENSG00000170276	HSPB2					ENSG00000169032	MAP2K1
ENSG00000140443	IGF1R					ENSG00000124145	SDC4
ENSG00000146648	EGFR					ENSG00000105989	WNT2
ENSG00000136869	TLR4					ENSG00000122691	TWIST1
ENSG00000067560	RHOA					ENSG00000112715	VEGFA
ENSG00000077157	PPP1R12B					ENSG00000100030	MAPK1
ENSG00000105971	CAV2					ENSG00000135404	CD63
ENSG00000137154	RPS6					ENSG00000135679	MDM2
ENSG00000133703	KRAS					ENSG00000178568	ERBB4
ENSG00000105329	TGFB1					ENSG00000142875	PRKACB
ENSG00000233608	TWIST2
ENSG00000104290	FZD3
ENSG00000133818	RRAS2
ENSG00000147065	MSN
ENSG00000156711	MAPK13
ENSG00000078061	ARAF
ENSG00000076928	ARHGEF1
ENSG00000141510	TP53
ENSG00000142798	HSPG2
ENSG00000085733	CTTN
ENSG00000160293	VAV2
ENSG00000105221	AKT2
ENSG00000138448	ITGAV
ENSG00000151150	ANK3
ENSG00000090020	SLC9A1
ENSG00000174804	FZD4
ENSG00000090447	TFAP4
ENSG00000058272	PPP1R12A
ENSG00000113360	DROSHA
ENSG00000087245	MMP2
ENSG00000124181	PLCG1
ENSG00000164305	CASP3
ENSG00000171608	PIK3CD
ENSG00000117461	PIK3R3
ENSG00000111432	FZD10
ENSG00000110092	CCND1
ENSG00000168036	CTNNB1
ENSG00000100644	HIF1A
ENSG00000142208	AKT1
ENSG00000136997	MYC
ENSG00000100985	MMP9
ENSG00000167244	IGF2
ENSG00000136068	FLNB
ENSG00000072062	PRKACA
ENSG00000063046	EIF4B
ENSG00000100234	TIMP3
ENSG00000196924	FLNA
ENSG00000150995	ITPR1
ENSG00000145675	PIK3R1
ENSG00000115904	SOS1
ENSG00000179295	PTPN11
ENSG00000108654	DDX5
ENSG00000136238	RAC1
ENSG00000197122	SRC
ENSG00000102882	MAPK3
ENSG00000138685	FGF2
ENSG00000070831	CDC42
ENSG00000139329	LUM
ENSG00000125503	PPP1R12C
ENSG00000157240	FZD1
ENSG00000166501	PRKCB
ENSG00000026103	FAS
ENSG00000174775	HRAS
ENSG00000109458	GAB1
ENSG00000117020	AKT3
ENSG00000058404	CAMK2B
ENSG00000138193	PLCE1
ENSG00000121879	PIK3CA
ENSG00000169439	SDC2
ENSG00000115414	FN1
ENSG00000124762	CDKN1A
ENSG00000124145	SDC4
ENSG00000128602	SMO
ENSG00000140992	PDPK1
ENSG00000062716	VMP1
ENSG00000198793	MTOR
ENSG00000122691	TWIST1
ENSG00000232810	TNF
ENSG00000096433	ITPR3
ENSG00000112715	VEGFA
ENSG00000077782	FGFR1
ENSG00000100030	MAPK1
ENSG00000122861	PLAU
ENSG00000177885	GRB2
ENSG00000135679	MDM2
ENSG00000126767	ELK1
ENSG00000108443	RPS6KB1
ENSG00000026508	CD44
ENSG00000142875	PRKACB
ENSG00000213639	PPP1CB
ENSG00000259207	ITGB3
