# Supplementary material for: MicroRNA Expression Profiling in Psoriatic Arthritis
Source: Biomed Res Int. 2018 Apr 23;2018:7305380. doi: 10.1155/2018/7305380 (PMC5937573; doi:10.1155/2018/7305380)
Supplement: Supplementary Table 8 — List of DEGs and their corresponding targeting miRNAs inversely modulated in PsA. [file 7305380.f8.xlsx]

## Sheet: Foglio1
SUPPLEMENTARY TABLE 8. List of DEGs and their corrisponding targeting miRNAs inversely modulated in PsA
DEGs	miRNAs:	References*:
CXCL2	hsa-miR-151a-5p	Balakrishnan I et al 2014
OLR1	hsa-miR-423-5p	Whisnant Adam W et al. 2013
IL1R1	hsa-miR-423-5p	Balakrishnan I et al 2014
CLEC5A	hsa-miR-423-5p	Karginov FV et al. 2013
HSPA1A	hsa-miR-186-5p, hsa-miR-92a-3p	Whisnant Adam W et al. 2013; Helwak Aleksandra et al. 2013
SRPR	hsa-miR-92a-3p	Karginov FV et al. 201; Haecker Irina et al. 2012; Helwak Aleksandra et al. 2013; Kishore S et al. 2011; Inna Lipchina et al. 2011; Pillai MM et al. 2014; Skalsky Rebecca L. et al. 2012
ILF3	hsa-miR-199a-3p, hsa-miR-186-5p, hsa-miR-130a-3p, hsa-miR-17-5p	Hafner M. et al 2010; Helwak Aleksandra et al. 2013; Karginov FV et al. 2013
NKTR	hsa-miR-186-5p	Kishore S et al. 2011; Skalsky Rebecca L. et al. 2012
IL6ST	hsa-miR-126-3p, hsa-miR-130a-3p, hsa-miR-148a-3p	Whisnant Adam W et al. 2013; Kameswaran V et al 2014; Skalsky Rebecca L. et al. 2012; Balakrishnan I et al 2014;
RYBP	hsa-miR-17-5p	Kameswaran V et al 2014
ATF5	hsa-miR-423-5p	Whisnant Adam W et al. 2013
PTPN13	hsa-miR-92a-3p, hsa-miR-186-5p	Helwak Aleksandra et al. 2013
FAF2	hsa-miR-199a-3p, hsa-miR-186-5p, hsa-miR-130a-3p, hsa-miR-17-5p	Whisnant Adam W et al. 2013; Karginov FV et al. 2013; Pillai MM et al. 2014; Inna Lipchina et al. 2011
CDC40	hsa-miR-17-5p	Kishore S et al. 2011; Pillai MM et al. 2014
PPP1R10	hsa-miR-130a-3p, hsa-miR-423-5p	Kishore S et al. 2011; Whisnant Adam W et al. 2013
NET1	hsa-miR-199a-3p	Kameswaran V et al 2014
EMP1	hsa-miR-130a-3p, hsa-miR-199a-3p, hsa-miR-423-5p	Balakrishnan I et al 2014
EZR	hsa-miR-186-5p, hsa-miR-92a-3p	Helwak Aleksandra et al. 2013
COL4A3	hsa-miR-17-5p	Lianjin Jin et al. 2014
MMP9	hsa-miR-451a	Yang Nan et al. 2010
CTSZ	hsa-miR-92a-3p	Whisnant Adam W et al. 2013
SDC2	hsa-miR-92a-3p, hsa-miR-17-5p	Kishore S et al. 2011; Karginov FV et al. 2013; Xue Y et al 2013;
SDC4	hsa-miR-130a-3p	Pillai MM et al. 2014
SH3BP4	hsa-miR-126-3p, hsa-miR-423-5p, hsa-miR-92a-3p	Balakrishnan I et al 2014; Pillai MM et al. 2014; Whisnant Adam W et al. 2013
MEF2A	hsa-miR-199a-3p, hsa-miR-186-5p, hsa-miR-17-5p	Whisnant Adam W et al. 2013; Kishore S et al. 2011; Xue Y et al 2013
SPP1	hsa-miR-126-3p	Nadia Felli et al. 2013
LMNA	hsa-miR-130a-3p	Balakrishnan I et al 2014
RAB13	hsa-miR-423-5p	Karginov FV et al. 2013
LMNB1	hsa-miR-199a-5p, hsa-miR-17-5p	Inna Lipchina et al. 2011; Pillai MM et al. 2014; Karginov FV et al. 2013
YWHAH	hsa-miR-186-5p	Skalsky Rebecca L. et al. 2012
SOCS6	hsa-miR-130a-3p, hsa-miR-186-5p, hsa-miR-17-5p	Eva Gottwein et al. 2011; Skalsky Rebecca L. et al. 2012; Xue Y et al 2013; Karginov FV et al. 2013; Xue Y et al 2013; Pillai MM et al. 2014
IFIT1	hsa-miR-186-5p	Skalsky Rebecca L. et al. 2012
DOCK4	hsa-miR-126-3p	Balakrishnan I et al 2014
IFI16	hsa-miR-92a-3p	Skalsky Rebecca L. et al. 2012
STK24	hsa-miR-186-5p	Helwak Aleksandra et al. 2013
TBL1X	hsa-miR-92a-3p	Helwak Aleksandra et al. 2013
BAMBI	hsa-miR-130a-3p, hsa-miR-17-5p	Kishore S et al. 2011; Haecker Irina et al. 2012; Pillai MM et al. 2014
KCNA3	hsa-miR-186-5p	Eva Gottwein et al. 2011
SEC14L1	hsa-miR-92a-3p, hsa-miR-17-5p	Skalsky Rebecca L. et al. 2012; Helwak Aleksandra et al. 2013
SLC25A37	hsa-miR-17-5p	Helwak Aleksandra et al. 2013
SLC39A8	hsa-miR-130a-3p,hsa-miR-92a-3p	Hafner M. et al 2010; Skalsky Rebecca L. et al. 2012
ATP1B1	hsa-miR-17-5p	Pillai MM et al. 2014
ARIH1	hsa-miR-92a-3p, hsa-miR-17-5p	Helwak Aleksandra et al. 2013; Whisnant Adam W et al. 2013
USP36	hsa-miR-92a-3p	Kishore S et al. 2011; Karginov FV et al. 2013
GOLGA2	hsa-miR-199a-3p	Karginov FV et al. 2013
GOLGA8A	hsa-miR-199a-3p, hsa-miR-92a-3p	Eva Gottwein et al. 2011; Kishore S et al. 2011; Skalsky Rebecca L. et al. 2012; Pillai MM et al. 2014
VPS13D	hsa-miR-130a-3p	Kishore S et al. 2011
* SOURCE: Tarbase
