# Supplementary material for: MicroRNA Expression Profiling in Psoriatic Arthritis
Source: Biomed Res Int. 2018 Apr 23;2018:7305380. doi: 10.1155/2018/7305380 (PMC5937573; doi:10.1155/2018/7305380)
Supplement: Supplementary Table 9 — Functional enrichment analysis of PsA modules. [file 7305380.f9.xlsx]

## Sheet: Foglio1
SUPPLEMENTARY TABLE 9. Functional enrichment analysis of PsA modules.
GO biological processes	p-value		PANTHER Pathways	p-value
M0
glycosaminoglycan catabolic process	<0.0001		None
retinoid metabolic process	0.00242
glycosaminoglycan biosynthetic process	0.00434
proteoglycan metabolic process	0.0155
M1
type I interferon signaling pathway	<0.0001		Toll-like receptor signaling pathway	0.031
positive regulation of interferon-alpha production	0.000598
positive regulation of interferon-beta production	0.00433
MDA-5 signaling pathway	0.00923
M2
inflammatory response	<0.0001		Inflammation mediated by chemokine and cytokine signaling pathway	<0.0001
chemokine-mediated signaling pathway	<0.0001		Unclassified	<0.0001
positive regulation of leukocyte migration	<0.0001		Interleukin signaling pathway	<0.0001
leukocyte chemotaxis	<0.0001		CCKR signaling map	<0.0001
immune response	<0.0001		Plasminogen activating cascade	<0.0001
G-protein coupled receptor signaling pathway	<0.0001		Blood coagulation	0.000105
dendritic cell chemotaxis	<0.0001		Alzheimer disease-presenilin pathway	0.00173
positive regulation of neutrophil chemotaxis	<0.0001		EGF receptor signaling pathway	0.029
extracellular matrix disassembly	0.0000806		JAK STAT signaling pathway	0.0319
positive regulation of cell adhesion	0.000332		Cell cycle	0.0411
neutrophil chemotaxis	0.00121
positive regulation of osteoclast differentiation	0.00124
regulation of T cell migration	0.00146
cellular response to lipopolysaccharide	0.0022
positive regulation of smooth muscle cell proliferation	0.00304
fusion of virus membrane with host plasma membrane	0.00445
cellular response to interleukin-1	0.00621
regulation of cell adhesion mediated by integrin	0.00767
regulation of interferon-gamma production	0.00772
calcium-mediated signaling	0.00902
positive regulation of ERK1 and ERK2 cascade	0.0101
regulation of epithelial cell proliferation	0.0127
positive regulation of epithelial cell migration	0.0154
positive regulation of cytosolic calcium ion concentration	0.0169
wound healing	0.0195
cellular response to growth factor stimulus	0.0199
T-helper 17 cell immune response	0.0151
positive regulation of protein kinase activity	0.0215
regulation of angiogenesis	0.0301
cellular response to tumor necrosis factor	0.0369
negative regulation of endopeptidase activity	0.0449
positive regulation of tyrosine phosphorylation of STAT protein	0.0463
positive regulation of cytokine production	0.0497
M3
extracellular matrix organization	<0.0001		Integrin signaling pathway	<0.0001
substrate adhesion-dependent cell spreading	<0.0001		Blood coagulation	0.000273
positive regulation of cell migration	0.000145		VEGF signaling pathway	0.0371
cell migration	0.000428		p53 pathway	0.0452
integrin-mediated signaling pathway	0.000783
cell-matrix adhesion	0.00272
cell-substrate junction assembly	0.0107
anatomical structure formation involved in morphogenesis	0.0111
regulation of cell proliferation	0.0246
M4
positive regulation of activated T cell proliferation	0.00256		Interleukin signaling pathway	<0.0001
regulation of defense response	0.00417		Interferon-gamma signaling pathway	<0.0001
positive regulation of interleukin-12 production	0.00476		CCKR signaling map	<0.0001
regulation of cell motility	0.00575		Angiogenesis	<0.0001
regulation of protein kinase activity	0.00632		EGF receptor signaling pathway	<0.0001
positive regulation of cell killing	0.00736		Gonadotropin-releasing hormone receptor pathway	0.000217
positive regulation of tyrosine phosphorylation of Stat3 protein	0.00736		p38 MAPK pathway	0.000218
positive regulation of T-helper 17 cell lineage commitment	0.0164		VEGF signaling pathway	0.000635
cytokine-mediated signaling pathway	0.0191		Ras Pathway	0.000707
positive regulation of tumor necrosis factor production	0.0267		FGF signaling pathway	0.00186
negative regulation of cell adhesion	0.0326		Inflammation mediated by chemokine and cytokine signaling pathway	0.00791
positive regulation of memory T cell differentiation	0.0369		JAK/STAT signaling pathway	0.00888
			p53 pathway feedback loops 2	0.0275
			Oxidative stress response	0.029
			Alzheimer disease-amyloid secretase pathway	0.0351
			B cell activation	0.037
