# Supplementary material for: MicroRNA Expression Profiling in Psoriatic Arthritis
Source: Biomed Res Int. 2018 Apr 23;2018:7305380. doi: 10.1155/2018/7305380 (PMC5937573; doi:10.1155/2018/7305380)
Supplement: Supplementary Table 10 — TargetScan analysis for the identification of novel miR-126-3p Targets. [file 7305380.f10.xlsx]

## Sheet: Foglio1
SUPPLEMENTARY TABLE 10. TargetScan analysis for the identification of novel miR-126-3p Targets
Target gene symbol:	Gene name:	Representative transcript:	Conserved sites:	Poorly conserved sites:	Total context score:
AKT2	v-akt murine thymoma viral oncogene homolog 2	ENST00000392038.2	1	0	-0.71
TNFSF11	tumor necrosis factor (ligand) superfamily, member 11	ENST00000405262.2	0	1	-0.66
SDC2	syndecan 2	ENST00000302190.4	1	0	-0.46
PPP3CB	protein phosphatase 3, catalytic subunit, beta isozyme	ENST00000360663.5	0	1	-0.33
* SOURCE: Tarbase
